# Supplementary material for: 12 Months Persistent Immunogenicity after Hepatitis B Vaccination in Patients with Type 2 Diabetes and Immunogenicity of Revaccination in Non-Responders: An Open-Label Randomized Controlled Trial
Source: MDPI journal article supplement (doi:10.3390/vaccines9121407), 2021-11-29
Supplement: s1 [file s1]

## Supplementary File S1 Criteria for the diagnosis of diabetes

According to the Chinese guidelines for the prevention and treatment of type 2 diabetes (2017 Edition), if the subjects meet the following conditions, they will be defined as type 2 diabetes in this study.

First, according to the medical records to determine the object to meet at least one of the following three conditions:

- (1) In a patient with classic symptoms of hyperglycemia or hyperglycemic crisis, a random plasma glucose  $\geq 11.1$  mmol/L.
- (2) Fasting plasma glucose (FPG)  $\geq 7.0$  mmol/L. Fasting is defined as no caloric intake for at least 8 hours.
- (3) 2-h plasma glucose  $\geq 11.1$  mmol/L during oral glucose tolerance test (OGTT). OGTT should use a glucose load containing the equivalent of 75 g anhydrous glucose dissolved in water.

Second, for the subjects that met the criteria in the previous step, whether HbA<sub>1c</sub> has been detected in the medical records is queried. If not, venous blood will be collected and HbA<sub>1c</sub> will be detected. When HbA<sub>1c</sub>  $\geq 6.3\%$ , the subjects are defined as type 2 diabetes.

Note: In the methods and results of this study, “people with diabetes” refer to “people with type 2 diabetes”.

### *Reference:*

*Chinese Diabetes Society. Chinese guidelines for the prevention and treatment of type 2 diabetes (2017 Edition). Chinese Journal of Diabetes Mellitus. 2018,10(1):4-67. DOI:10.3760/cma.j.issn.1674-5809.2018.01.003.*

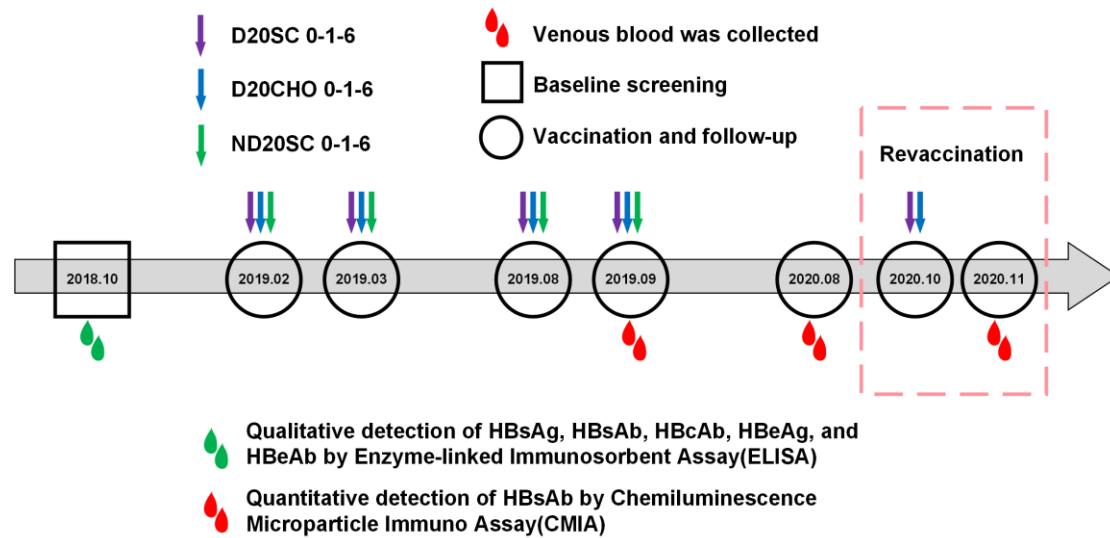

Note:

- ✧ D20SC 0-1-6: Diabetic group vaccinated with recombinant hepatitis B vaccine (20μg HBsAg, *Saccharomyces cerevisiae* recombinant) according to the schedule of 0-1-6 month;
- ✧ D20CHO 0-1-6: Diabetic group vaccinated with recombinant hepatitis B vaccine (20μg HBsAg, Chinese hamster ovary cells (CHO) recombinant) according to the schedule of 0-1-6 month;
- ✧ ND20SC 0-1-6: Control group vaccinated with recombinant hepatitis B vaccine (20μg HBsAg, *Saccharomyces cerevisiae* recombinant) according to the schedule of 0-1-6 month.

Supplementary Figure S1 Study design including baseline screening, routine vaccinations, and blood sampling timepoints

## Supplementary File S2 Sample size calculated by PASS

### Design Tab

|                                        |                       |
|----------------------------------------|-----------------------|
| Solve For                              | Sample Size           |
| Power Calculation Method               | Normal Approximation  |
| Alternative Hypothesis                 | One-Sided             |
| Test Type                              | Z-Test (Unpooled)     |
| Power                                  | 0.8                   |
| Alpha                                  | 0.05                  |
| Group Allocation                       | Equal ( $N_1 = N_2$ ) |
| Input Type                             | Differences           |
| $D_1$ (Difference  $H_1 = P_1 - P_2$ ) | -0.15                 |
| $P_2$ (Group 2 Proportion)             | 0.95                  |

### Numeric Results for Testing Two Proportions using the Z-Test with Pooled Variance

$H_0: P_1 - P_2 = D_1 \geq 0$  vs.  $H_1: P_1 - P_2 = D_1 < 0$ .

| Target Power | Actual Power* | Diabetic group ( $N_1$ ) | Healthy group ( $N_2$ ) | Seroconversion rate in the healthy group ( $P_2$ ) | Differences ( $D_1$ ) | Alpha |
|--------------|---------------|--------------------------|-------------------------|----------------------------------------------------|-----------------------|-------|
| 0.80         | 0.80592       | 58                       | 58                      | 0.95                                               | -0.15                 | 0.05  |

\* Power was computed using the normal approximation method.

### Report Definitions

Target Power is the desired power value (or values) entered in the procedure. Power is the probability of rejecting a false null hypothesis.

Actual Power is the power obtained in this scenario. Because  $N_1$  and  $N_2$  are discrete, this value is often (slightly) larger than the target power.

$N_1$  and  $N_2$  are the number of items sampled from each population.

$P_1$  is the proportion for treatment or experimental group at which power and sample size calculations are made.

$P_2$  is the proportion for healthy group.

$D_1$  is the difference  $P_1 - P_2$  assumed for power and sample size calculations.

Alpha is the probability of rejecting a true null hypothesis.

### Summary Statements

Group sample sizes of 58 in diabetic group and 58 in healthy group achieve 80.592% power to detect a difference between the group proportions of -15%. The proportion in diabetic group is assumed to be 95% under the null hypothesis and 80% under the alternative hypothesis. The proportion in healthy group is 95%. The test statistic used is the one-sided Z-Test with unpooled variance. The significance level of the test is 0.05.

### Dropout-Inflated Sample Size

| Dropout Rate | Sample Size |       | Dropout-Inflated Enrollment |        | Expected Number of Dropouts |        |
|--------------|-------------|-------|-----------------------------|--------|-----------------------------|--------|
|              | $N_1$       | $N_2$ | $N_1'$                      | $N_2'$ | $D_1'$                      | $D_2'$ |
| 20%          | 58          | 58    | 73                          | 73     | 15                          | 15     |

## Definitions

Dropout Rate (DR) is the percentage of subjects (or items) that are expected to be lost at random during the course of the study and for whom no response data will be collected (i.e. will be treated as “missing”).

$N_1$  and  $N_2$  are the evaluable sample sizes at which power is computed. If  $N_1$  and  $N_2$  subjects are evaluated out of the  $N_1'$  and  $N_2'$  subjects that are enrolled in the study, the design will achieve the stated power.

$N_1'$  and  $N_2'$  are the number of subjects that should be enrolled in the study in order to end up with  $N_1$  and  $N_2$  evaluable subjects, based on the assumed dropout rate. After solving for  $N_1$  and  $N_2$ ,  $N_1'$  and  $N_2'$  are calculated by inflating  $N_1$  and  $N_2$  using the formulas  $N_1' = N_1 / (1 - DR)$  and  $N_2' = N_2 / (1 - DR)$ , with  $N_1'$  and  $N_2'$  always rounded up. (See Chow, S.C., Shao, J., and Wang, H. (2008) pages 39-40.)

$D_1'$  and  $D_2'$  are the expected number of dropouts.  $D_1' = N_1' - N_1$ , and  $D_2' = N_2' - N_2$ .

## References

- [1] Chow, S.C., Shao, J., Wang, H. Sample Size Calculations in Clinical Research. Second Edition. Chapman & Hall/CRC. Boca Raton, Florida. 2008.
- [2] D'Agostino, R.B., Chase, W., Belanger, A. The Appropriateness of Some Common Procedures for Testing the Equality of Two Independent Binomial Populations. The American Statistician, 1988, 42(3):198-202.
- [3] Fleiss, J. L., Levin, B., Paik, M.C. Statistical Methods for Rates and Proportions. Third Edition. John Wiley & Sons. New York. 2003.
- [4] Lachin, John M. Biostatistical Methods. John Wiley & Sons. New York. 2000.
- [5] Machin, D., Campbell, M., Fayers, P., Pinol, A. Sample Size Tables for Clinical Studies, 2<sup>nd</sup> Edition. Blackwell Science. Malden, Mass. 1997.
- [6] Ryan, Thomas P. Sample Size Determination and Power. John Wiley & Sons. Hoboken, New Jersey. 2013.

Supplementary Table S1 Response at months 1 and 12 after being fully vaccinated for participants in the Per-protocol analysis and Intention-to-vaccinate analysis

| Time of assessment*                    | Per-protocol analysis,<br>No. of Responders/No. Undergoing Testing (%) |                         |                        | Intention-to-vaccinate analysis,<br>No. of Responders/No. of participants (%) |                         |                        |
|----------------------------------------|------------------------------------------------------------------------|-------------------------|------------------------|-------------------------------------------------------------------------------|-------------------------|------------------------|
|                                        | D20SC 0-1-6<br>(n=106)                                                 | D20CHO 0-1-6<br>(n=116) | ND20SC 0-1-6<br>(n=70) | D20SC 0-1-6<br>(n=113)                                                        | D20CHO 0-1-6<br>(n=119) | ND20SC 0-1-6<br>(n=77) |
| One month after being fully vaccinated |                                                                        |                         |                        |                                                                               |                         |                        |
| Response                               | 95/106(89.6)                                                           | 106/116(91.4)           | 68/70(97.1)            | 95/113(84.1)                                                                  | 106/119(89.1)           | 68/77(88.3)            |
| High-level response                    | 80/106(75.5)                                                           | 93/116(80.2)            | 60/70(85.7)            | 80/113(70.8)                                                                  | 93/119(78.2)            | 60/77(77.9)            |
| 12 months after being fully vaccinated |                                                                        |                         |                        |                                                                               |                         |                        |
| Response                               | 73/101(72.3)                                                           | 95/111(85.6)            | 55/66(83.3)            | 73/113(64.6)                                                                  | 95/119(79.8)            | 55/77(71.4)            |
| High-level response                    | 37/101(36.6)                                                           | 50/111(45.0)            | 34/66(51.5)            | 37/113(32.7)                                                                  | 50/119(42.0)            | 34/77(44.2)            |
| Statistical difference                 |                                                                        |                         |                        |                                                                               |                         |                        |
| Response                               | $\chi^2=6.27, P=0.01$                                                  | $\chi^2=1.88, P=0.17$   | $\chi^2=7.49, P=0.01$  | $\chi^2=11.23, P<0.01$                                                        | $\chi^2=3.87, P=0.049$  | $\chi^2=6.83, P=0.01$  |
| High-level response                    | $\chi^2=30.75, P<0.01$                                                 | $\chi^2=30.03, P<0.01$  | $\chi^2=18.61, P<0.01$ | $\chi^2=32.77, P<0.01$                                                        | $\chi^2=32.39, P<0.01$  | $\chi^2=18.46, P<0.01$ |

\* Response indicates hepatitis B surface antibody (HBsAb) concentrations of 10 mIU/mL or greater; High-level response indicates HBsAb concentrations of 100 mIU/mL or greater

- ✧ D20SC 0-1-6: Diabetic group vaccinated with recombinant hepatitis B vaccine (20µg HBsAg, Saccharomyces cerevisiae recombinant) according to the schedule of 0-1-6 month;
- ✧ D20CHO 0-1-6: Diabetic group vaccinated with recombinant hepatitis B vaccine (20µg HBsAg, Chinese hamster ovary cells (CHO) recombinant) according to the schedule of 0-1-6 month;
- ✧ ND20SC 0-1-6: Control group vaccinated with recombinant hepatitis B vaccine (20µg HBsAg, Saccharomyces cerevisiae recombinant) according to the schedule of 0-1-6 month.

Supplementary Table S2 Characteristics of non-responders after vaccination in the per-protocol population

|                              |        | D20SC 0-1-6 |                              |          |      | D20CHO 0-1-6 |                              |          |      | ND20SC 0-1-6 |                              |          |      |
|------------------------------|--------|-------------|------------------------------|----------|------|--------------|------------------------------|----------|------|--------------|------------------------------|----------|------|
|                              |        | N           | Number of non-responders (%) | $\chi^2$ | P    | N            | Number of non-responders (%) | $\chi^2$ | P    | N            | Number of non-responders (%) | $\chi^2$ | P    |
| Sex                          | Female | 70          | 7(10.0)                      | 0.03     | 0.86 | 71           | 6(8.5)                       | 0.01     | 0.93 | 37           | 2(5.4)                       | 0.41     | 0.52 |
|                              | Male   | 36          | 4(11.1)                      |          |      | 45           | 4(8.9)                       |          |      | 33           | 0(0)                         |          |      |
| Age(years)                   | ≤50    | 18          | 1(5.6)                       | 2.38     | 0.30 | 21           | 1(4.8)                       | 0.91     | 0.63 | 21           | 1(4.8)                       | 0.69     | 0.71 |
|                              | 50-60  | 52          | 4(7.7)                       |          |      | 54           | 6(11.1)                      |          |      | 35           | 1(2.9)                       |          |      |
|                              | >60    | 36          | 6(16.7)                      |          |      | 41           | 3(7.3)                       |          |      | 14           | 0(0)                         |          |      |
| Education                    |        |             |                              | 1.96     | 0.38 |              |                              | 2.51     | 0.29 |              |                              | 4.80     | 0.09 |
| Senior high school and above |        | 5           | 0(0)                         |          |      | 9            | 0(0)                         |          |      | 9            | 0(0)                         |          |      |
| Junior high school           |        | 23          | 4(17.4)                      |          |      | 26           | 4(15.4)                      |          |      | 21           | 2(9.5)                       |          |      |
| Primary school and below     |        | 78          | 7(9.0)                       |          |      | 81           | 6(7.4)                       |          |      | 40           | 0(0)                         |          |      |
| Marriage                     |        |             |                              | 1.28     | 0.26 |              |                              | 2.15     | 0.14 |              |                              | 2.15     | 0.14 |
| Married                      |        | 96          | 11(11.5)                     |          |      | 110          | 8(7.3)                       |          |      | 67           | 1(1.5)                       |          |      |
| Unmarried                    |        | 10          | 0(0)                         |          |      | 6            | 2(33.3)                      |          |      | 3            | 1(33.3)                      |          |      |
| Diabetic duration(years)     |        |             |                              | 1.57     | 0.67 |              |                              | 4.40     | 0.22 |              |                              |          |      |
| ≤2                           |        | 13          | 1(7.7)                       |          |      | 25           | 3(12.0)                      |          |      |              |                              |          |      |
| 2-4                          |        | 34          | 3(8.8)                       |          |      | 29           | 1(3.4)                       |          |      |              |                              |          |      |
| 4-7                          |        | 23          | 4(17.4)                      |          |      | 32           | 5(15.6)                      |          |      |              |                              |          |      |
| >7                           |        | 36          | 3(8.3)                       |          |      | 30           | 1(3.3)                       |          |      |              |                              |          |      |
| <b>Total</b>                 |        | <b>106</b>  | <b>11(10.4)</b>              |          |      | <b>116</b>   | <b>10(8.6)</b>               |          |      | <b>70</b>    | <b>2(2.9)</b>                |          |      |

- ✧ D20SC 0-1-6: Diabetic group vaccinated with recombinant hepatitis B vaccine (20μg HBsAg, Saccharomyces cerevisiae recombinant) according to the schedule of 0-1-6 month;
- ✧ D20CHO 0-1-6: Diabetic group vaccinated with recombinant hepatitis B vaccine (20μg HBsAg, Chinese hamster ovary cells (CHO) recombinant) according to the schedule of 0-1-6 month;
- ✧ ND20SC 0-1-6: Control group vaccinated with recombinant hepatitis B vaccine (20μg HBsAg, Saccharomyces cerevisiae recombinant) according to the schedule of 0-1-6 month.

Supplementary Table S3 Response after revaccination of non-responders in diabetic patients

| Group | Non responders in the initial study | Responders after revaccination (%) | GMC after revaccination(mIU/mL) |
|-------|-------------------------------------|------------------------------------|---------------------------------|
| SV60  | 10                                  | 10(100.0)                          | 491.7                           |
| SV20  | 9                                   | 6(66.7)                            | 29.7                            |

✧ SV60: Revaccinated with one dose of recombinant hepatitis B vaccine (60µg HBsAg, Saccharomyces cerevisiae recombinant);

✧ SV20: Revaccinated with one dose of recombinant hepatitis B vaccine (20µg HBsAg, Saccharomyces cerevisiae recombinant)
